# Supplementary material for: Effectiveness of COVID-19 shelter-in-place orders varied by state
Source: PubMed Central journal article supplement (PMC7775080; doi:10.1371/journal.pone.0245008), 2020-12-31
Supplement: pone.0245008.s011.pdf [file pone.0245008.s011.pdf]

December 12, 2020

Dear Dr. Meliker,

Thank you for again giving me the opportunity to serve as a referee for the *PLOS ONE*. Enclosed please find my referee report for “Effectiveness of COVID-19 Shelter-in-Place Orders Varied By States” (PONE-D-20-29575\_R1).

The authors have addressed most of my comments and questions in the previous report. I do not have further comments.

As in my previous cover letter to you, I might not be in a position to judge if the contribution of this paper is sufficient for PLOS ONE. I hope my questions and comments are relevant and worth being addressed. Thank you.

Sincerely yours,

Ying-Ying Lee

Assistant Professor of Economics  
University of California, Irvine  
Irvine, CA 92697-5100, U.S.A.  
yingying.lee@uci.edu  
<https://sites.google.com/site/yyleelilian/>
